# Supplementary material for: Electrochemically-driven actuators: from materials to mechanisms and from performance to applications
Source: Royal Society of Chemistry journal article supplement (doi:10.1039/d3cs00906h), 2024-01-01

## Supplemental Information

### **Electrochemical-driven actuators: from materials to mechanism, from performance to applications**

Lixue Yang,<sup>a</sup> Yiyao Zhang,<sup>a</sup> Wenting Cai,<sup>c</sup> Junlong Tan,<sup>a</sup> Heather Hansen,<sup>d</sup> Hongzhi Wang,<sup>b</sup> Yan Chen,<sup>\*a</sup> Meifang Zhu<sup>\*b</sup> and Jiuke Mu<sup>\*a</sup>

<sup>a</sup> Key Laboratory of Mechanism Theory and Equipment Design of Ministry of Education, School of Mechanical Engineering, Tianjin University, 135 Yaguan Road, Tianjin, 300350 China.

<sup>b</sup> State Key Laboratory for Modification of Chemical Fibers and Polymer Materials, College of Materials Science and Engineering, Donghua University, Shanghai, 201620 China.

<sup>c</sup> School of Chemistry, Xi'an Jiaotong University, 28 Xianning West Road, Xi'an, 710049 China.

<sup>d</sup> Department of Biochemistry and Molecular Medicine, West Virginia University, Morgantown, WV, 26506 USA.

\*Corresponding Author. E-mail address: [jiukemu@tju.edu.cn](mailto:jiukemu@tju.edu.cn); [yan\\_chen@tju.edu.cn](mailto:yan_chen@tju.edu.cn); [zmf@dhu.edu.cn](mailto:zmf@dhu.edu.cn)

**The logic diagrams of this review article:**

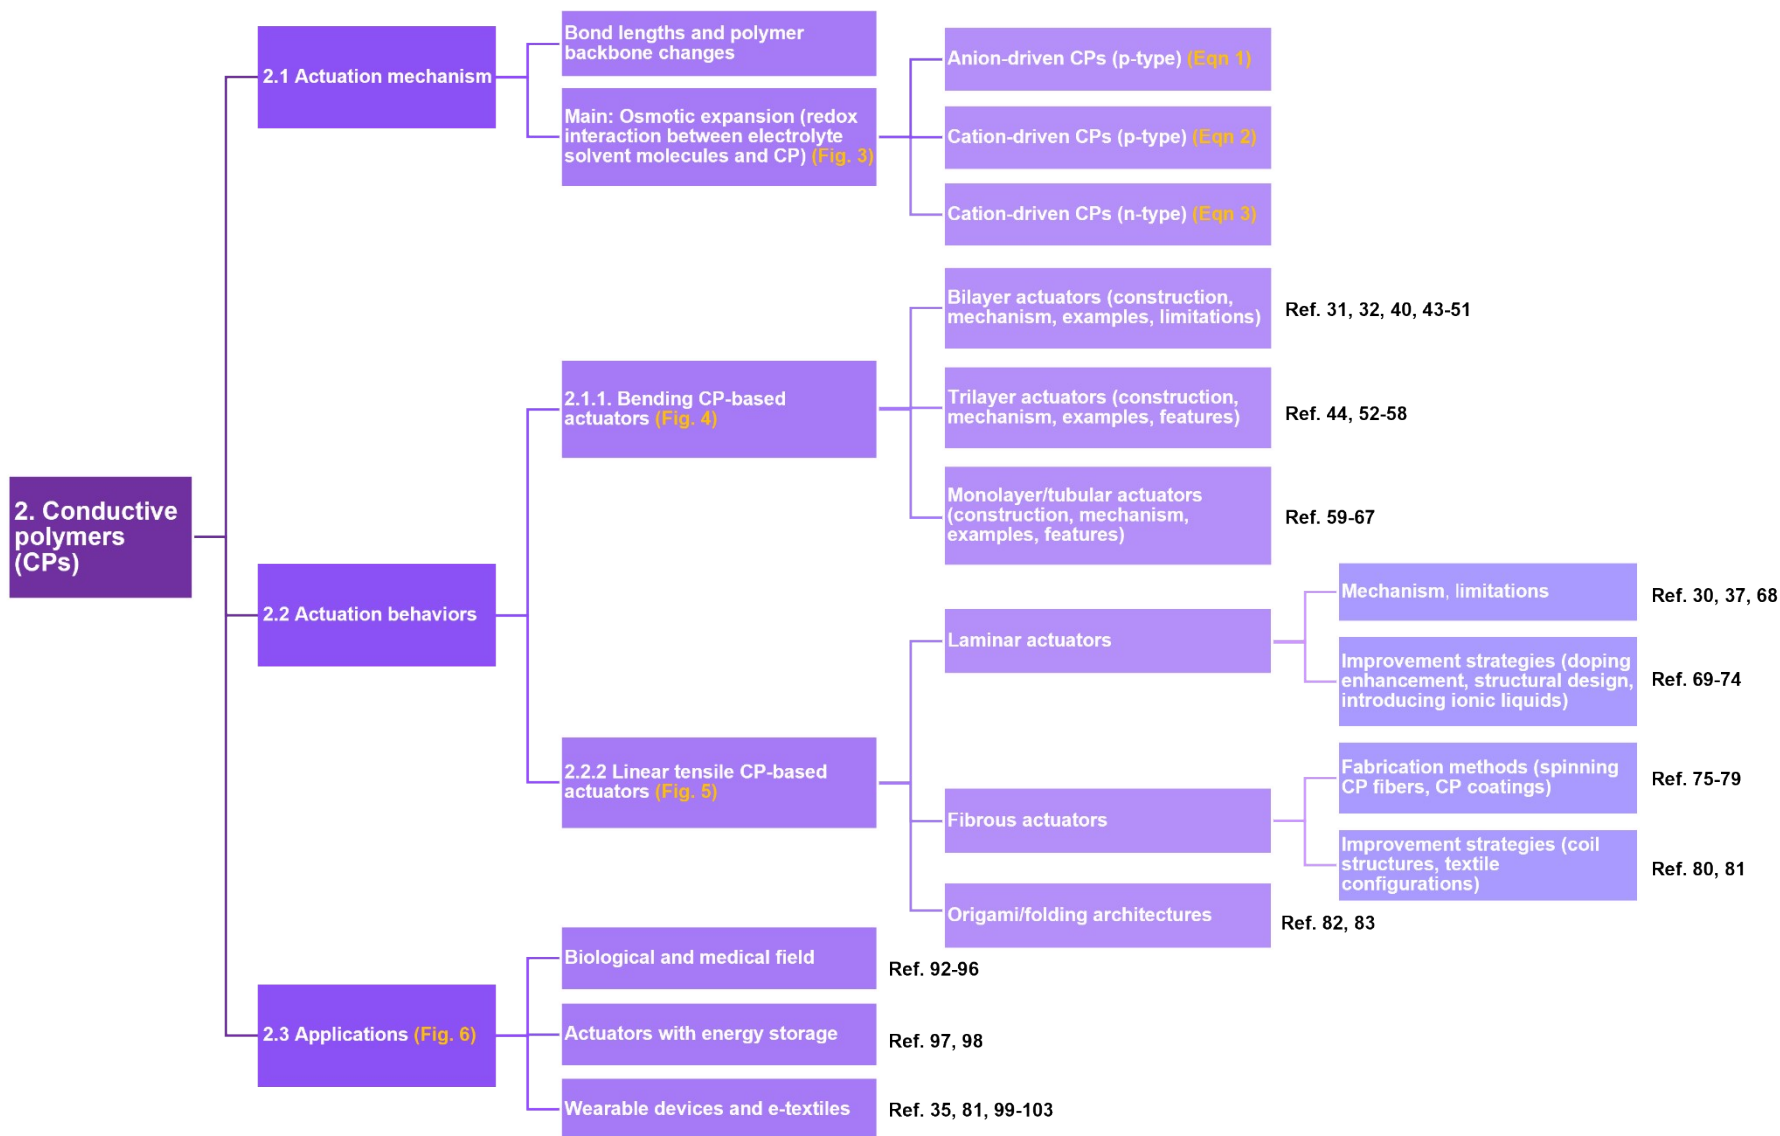

### 3. Nano metal-based materials (nanoporous metals, alloys, metal oxides)

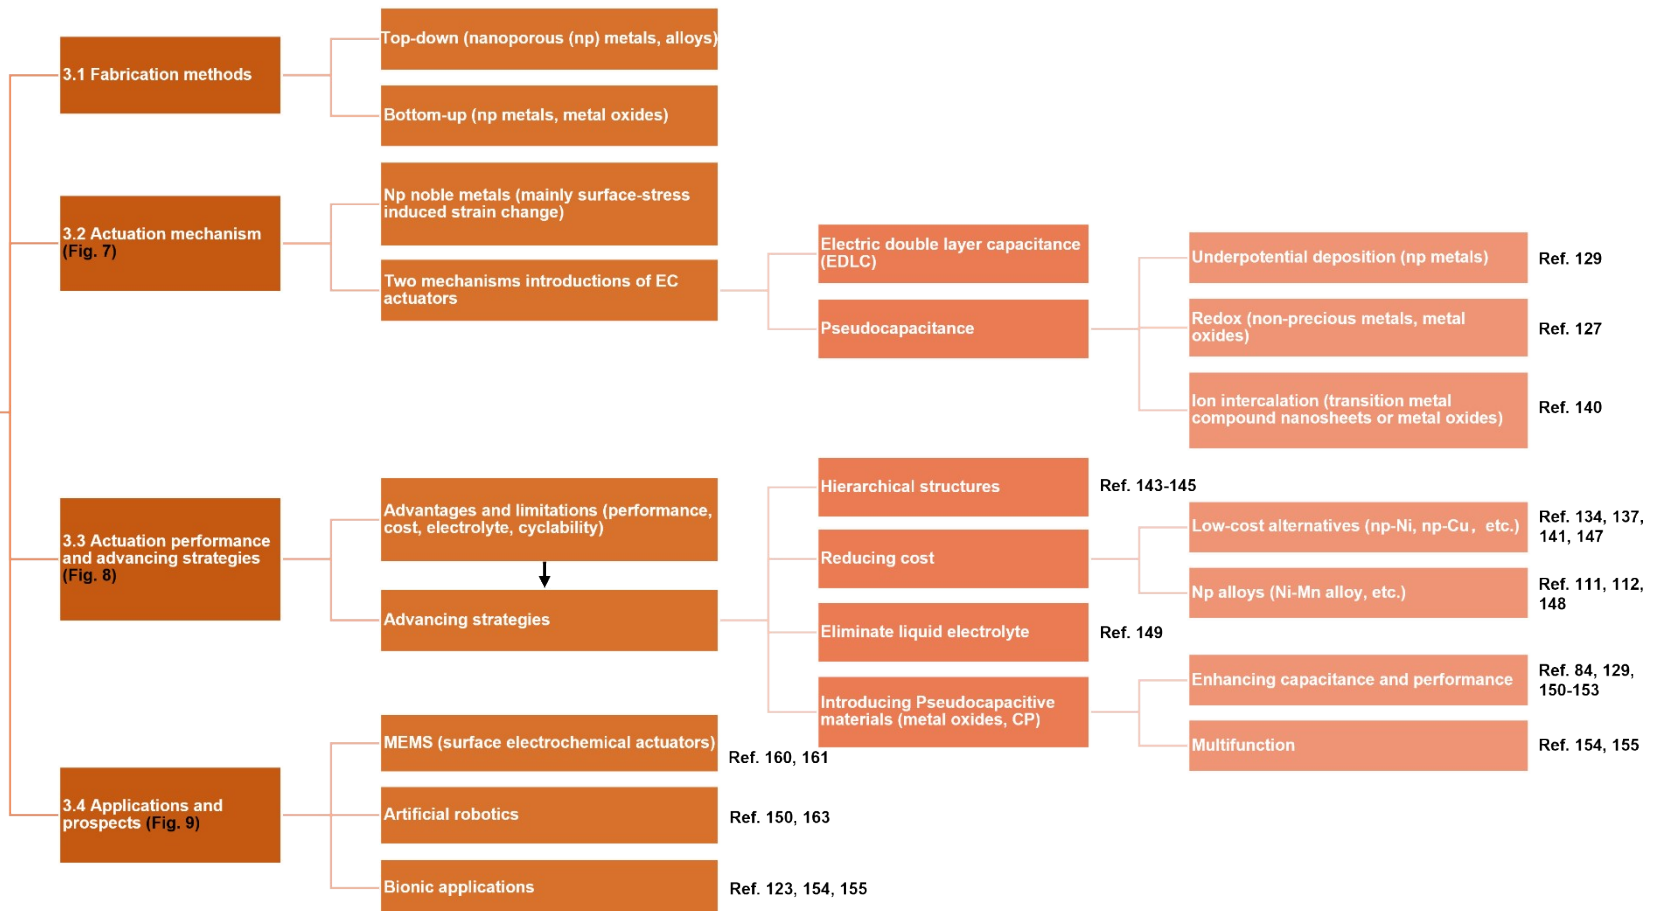

# 4. Ionic polymer metal composites (IPMCs)

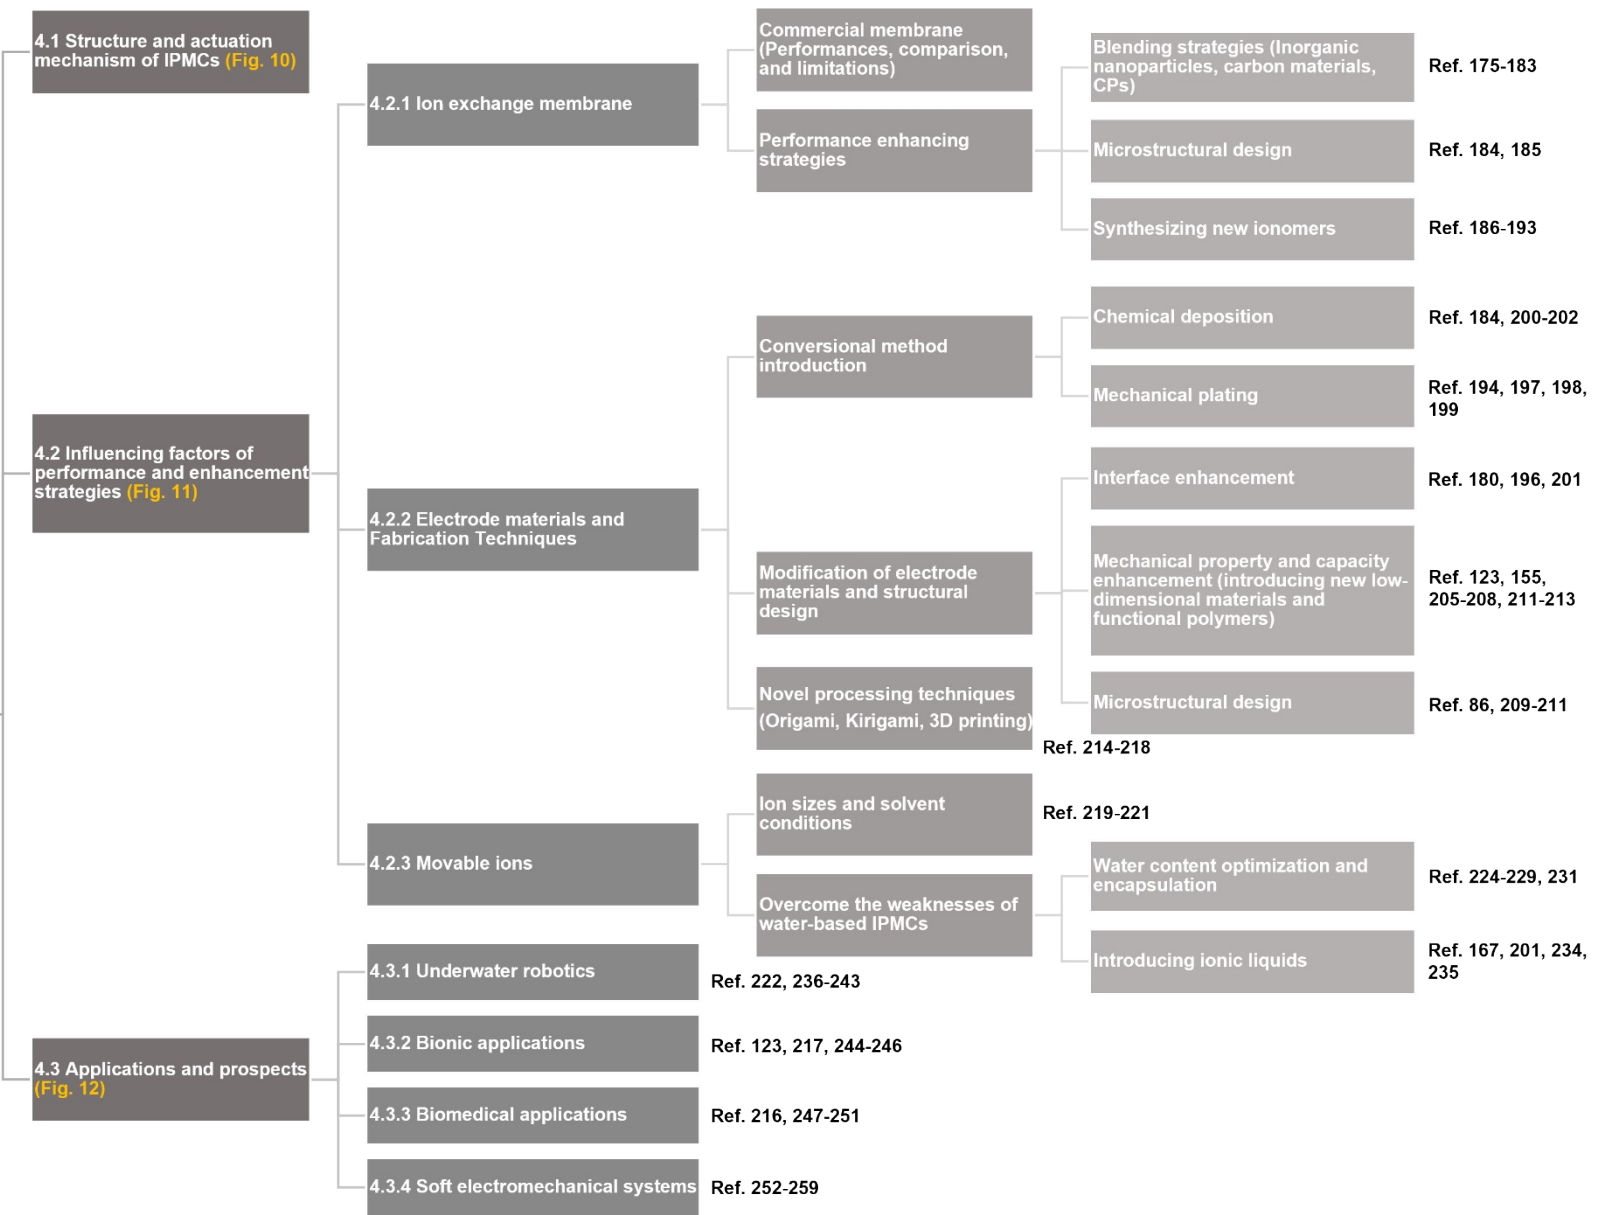

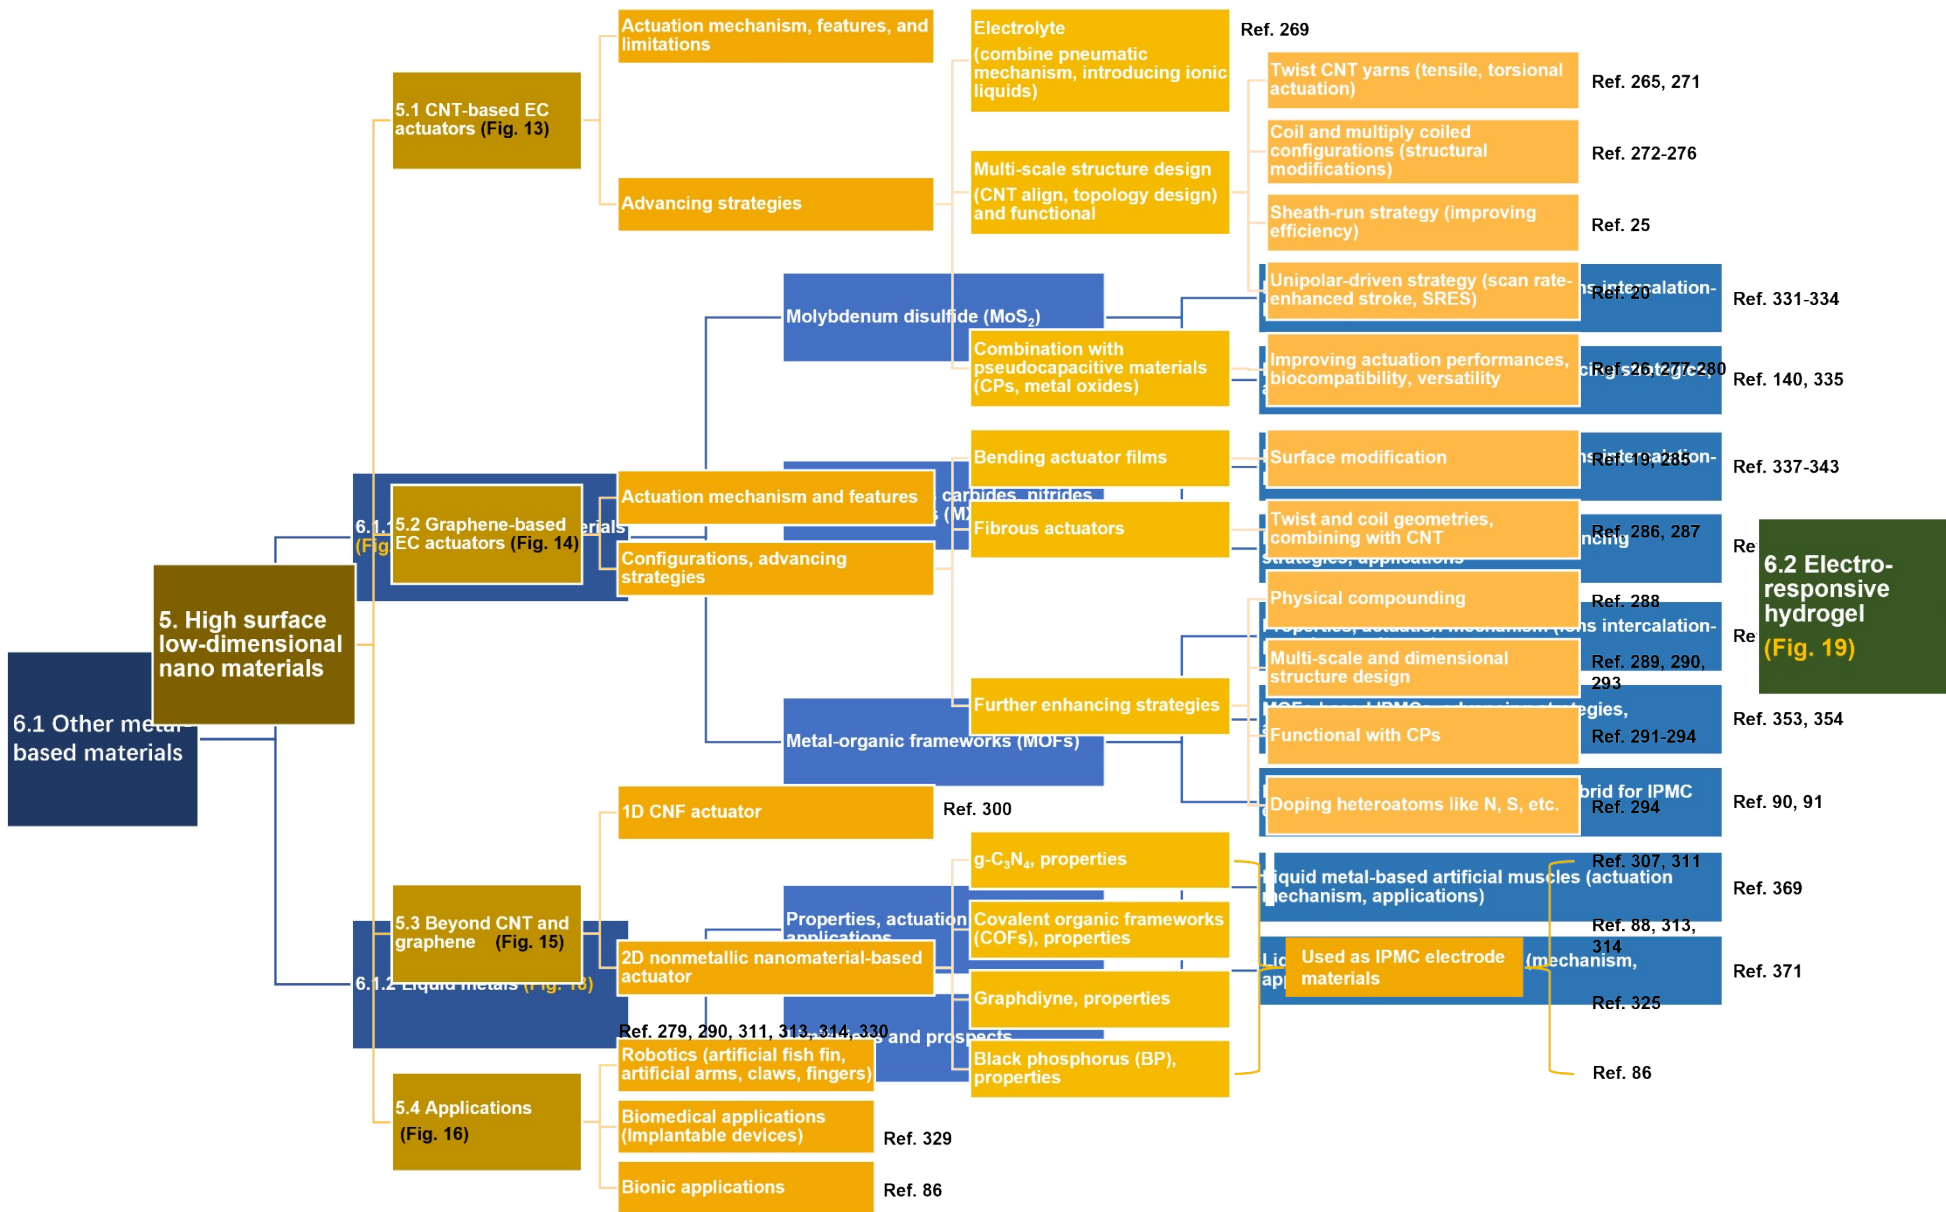

Supplement: d3cs00906h1.pdf [file d3cs00906h1.pdf]
